# Supplementary material
Source: HighWire-hosted journal article supplement (https://cmajopen.ca/highwire/filestream/90217/field_highwire_adjunct_files/0/open-2022-0145-1-at.pdf)
Supplement: open-2022-0145-1-at.pdf [file open-2022-0145-1-at.pdf]

Appendix 1: Proportion of total healthcare interactions for sickle cell disease by Individuals without insurance through the Ontario Health Insurance Plan (OHIP)

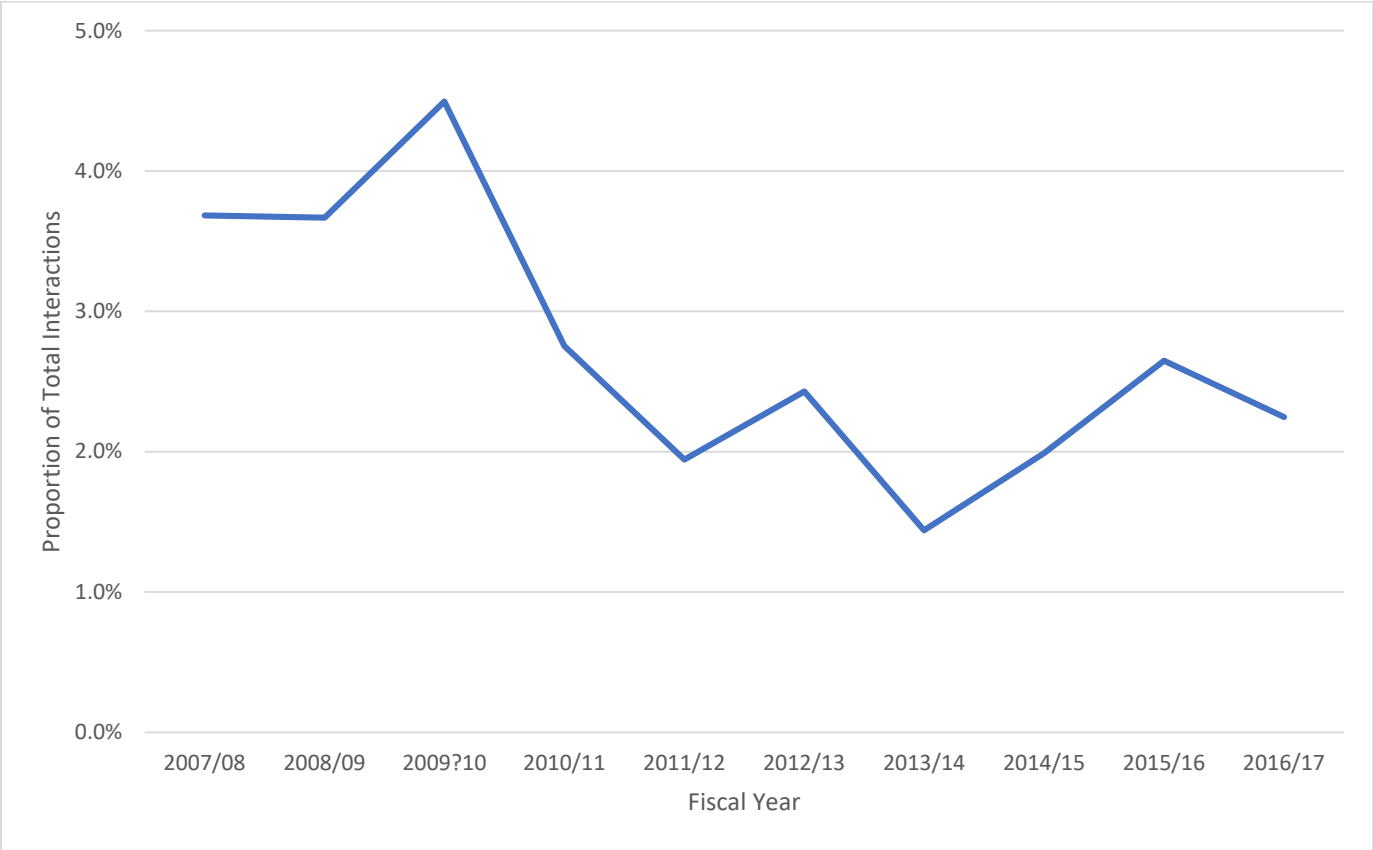

Appendix 1, as supplied by the authors. Appendix: to Pendergrast J, Tunji Ajayi L, Kim E, et al. Sickle cell disease in Ontario: an epidemiologic profile based on health administrative data. *CMAJ Open* 2023. DOI:10.9778/cmajo.20220145. Copyright © 2023 The Author(s) or their employer(s). To receive this resource in an accessible format, please contact us at [cmajgroup.cmaj.ca](mailto:cmajgroup.cmaj.ca).
